# Supplementary material
Source: ML conference proceedings conference paper supplement (https://proceedings.mlr.press/v33/vladymyrov14.html)
Supplement: Supplementary file 1 [file vladymyrov14-supp.tgz]

Archive with 3 entries (3 files):
- 113-supp.pdf
- README.txt
- infiniteMMNIST.gif
