# Supplementary material
Source: ML conference proceedings conference paper supplement (https://proceedings.mlr.press/v33/vladymyrov14.html)
Supplement: Supplementary file 1 [file vladymyrov14-supp.tgz › README.txt]

Supplementary material:

- 113-supp.pdf: formulae and error bounds for the Fast Gauss Transform (FGT)
  approximation; an extended discussion of the noise model, including a proof
  of theorem 3.1 from the paper; and additional experiments' figures.

- infiniteMNIST.gif: GIF animation of the EE run on the infinite MNIST data set 
  with N=1020000 images of handwritten digits with Fast Gauss Transform (FGT) 
  and Barnes-Hut (BH) approximations using gradient descent (GD), fixed-point 
  iteration (FP) and L-BFGS. For each plot, the runtime grows from 0 to 660 
  minutes with a step of 10 min. 

All these animations may be seen with a web browser or with specialized
GIF image viewers.
