# Supplementary material
Source: ML conference proceedings conference paper supplement (https://proceedings.mlr.press/v33/vladymyrov14.html)

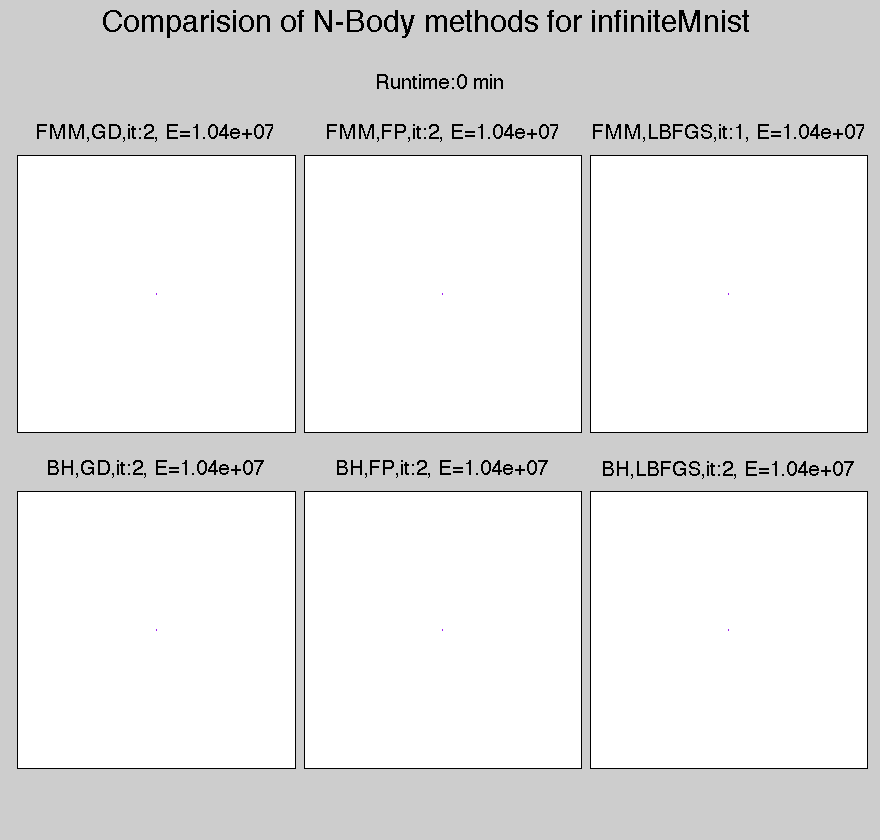

Supplement: Supplementary file 1 [file vladymyrov14-supp.tgz › infiniteMMNIST.gif]
